# Supplementary material for: Effect of acid catalyst on structural transformation and hydrolysis of cellulose in hydrothermal conditions
Source: Royal Society of Chemistry journal article supplement (doi:10.1039/b803384f), 2008-01-01
Supplement: b803384f.pdf [file b803384f.pdf]

# Electronic Supporting Information for “Effect of acid catalyst on structural transformation and hydrolysis of cellulose in hydrothermal conditions”

*Shigeru Deguchi,\* Kaoru Tsujii,† and Koki Horikoshi*

Extremobiosphere Research Center, Japan Agency for Marine-Earth Science and Technology (JAMSTEC), 2-15 Natsushima-cho, Yokosuka 237-0061, Japan.

†Nanotechnology Research Center, Research Institute for Electronic Science, Hokkaido University, N21, W10 Kita-ku, Sapporo 001-0021, Japan.

## **Movie caption**

**Movie 1S** A movie showing behaviour of crystalline cellulose in the presence of 10 mol dm<sup>-3</sup> of H<sub>2</sub>SO<sub>4</sub> in water at high temperatures and pressures. Pressure was kept constant at 25 MPa during the observation. The movie has been edited to 40 times the original playback rate.

**Movie 2S** A movie showing behaviour of crystalline cellulose in the presence of 20 mol dm<sup>-3</sup> of H<sub>2</sub>SO<sub>4</sub> in water at high temperatures and pressures. Pressure was kept constant at 25 MPa during the observation. The movie has been edited to 40 times the original playback rate.
